# Supplementary material for: Quality Reporting of Radiomics Analysis in Mild Cognitive Impairment and Alzheimer's Disease: A Roadmap for Moving Forward
Source: PubMed Central journal article supplement — Korean J Radiol. 2020 Oct 30;21(12):1345–54. doi: 10.3348/kjr.2020.0715 (PMC7689149; doi:10.3348/kjr.2020.0715), 2020-10-30
Supplement: kjr-21-1350-s001.pdf [file kjr-21-1350-s001.pdf]

**Supplementary Table 1. The Six Key Domains of the RQS**

| Domain |                                                      |                                                                                                                                                                                                                                                                      | Score                                                                                                                                                                                                                                                                                                                                                                                              | RQS Criteria |
|--------|------------------------------------------------------|----------------------------------------------------------------------------------------------------------------------------------------------------------------------------------------------------------------------------------------------------------------------|----------------------------------------------------------------------------------------------------------------------------------------------------------------------------------------------------------------------------------------------------------------------------------------------------------------------------------------------------------------------------------------------------|--------------|
| 1      | Image protocol quality                               | Well-documented image protocols (for example, contrast, slice thickness, energy, etc.) and/or usage of public image protocols allow reproducibility/replicability                                                                                                    | +1 (if protocols are well-documented)<br>+1 (if public protocol is used)                                                                                                                                                                                                                                                                                                                           | 1            |
|        | Multiple segmentations                               | Segmentation by different physicians/algorithms/software, perturbing segmentations by (random) noise, segmentation at different breathing cycles. Analyse feature robustness to segmentation variabilities                                                           | +1                                                                                                                                                                                                                                                                                                                                                                                                 | 2            |
|        | Phantom study on all scanners                        | Detect inter-scanner differences and vendor-dependent features. Analyse feature robustness to these sources of variability                                                                                                                                           | +1                                                                                                                                                                                                                                                                                                                                                                                                 | 3            |
|        | Imaging at multiple time points                      | Collect images of individuals at additional time points. Analyse feature robustness to temporal variabilities (for example, organ movement, organ expansion/shrinkage)                                                                                               | +1                                                                                                                                                                                                                                                                                                                                                                                                 | 4            |
| 2      | Feature reduction or adjustment for multiple testing | Decreases the risk of overfitting. Overfitting is inevitable if the number of features exceeds the number of samples. Consider feature robustness when selecting features                                                                                            | -3 (if neither measure is implemented) +3 (if either measure is implemented)                                                                                                                                                                                                                                                                                                                       | 5            |
|        | Validation                                           | The validation is performed without retraining and without adaptation of the cut-off value, provides crucial information with regards to credible clinical performance                                                                                               | -5 (if validation is missing)<br>+2 (if validation is based on a dataset from the same institute)<br>+3 (if validation is based on a dataset from another institute)<br>+4 (if validation is based on two datasets from two distinct institutes)<br>+4 (if the study validates a previously published signature)<br>+5 (if validation is based on three or more datasets from distinct institutes) | 12           |
| 3      | Multivariable analysis with non-radiomics features   | (for example, apolipoprotein E genotype) - is expected to provide a more holistic model. Permits correlating/inferencing between radiomics and non radiomics features                                                                                                | +1                                                                                                                                                                                                                                                                                                                                                                                                 | 6            |
|        | Detect and discuss biological correlates             | Demonstration of phenotypic differences (possibly associated with underlying gene-protein expression patterns) deepens understanding of radiomics and biology                                                                                                        | +1                                                                                                                                                                                                                                                                                                                                                                                                 | 7            |
|        | Comparison to 'gold standard'                        | Assess the extent to which the model agrees with/is superior to the current 'gold standard' method (for example, TNM-staging for survival prediction). This comparison shows the added value of radiomics                                                            | +2                                                                                                                                                                                                                                                                                                                                                                                                 | 13           |
|        | Potential clinical utility                           | Report on the current and potential application of the model in a clinical setting (for example, decision curve analysis)                                                                                                                                            | +2                                                                                                                                                                                                                                                                                                                                                                                                 | 14           |
| 4      | Cut-off analyses                                     | Determine risk groups by either the median, a previously published cut-off or report a continuous risk variable. Reduces the risk of reporting overly optimistic results                                                                                             | +1                                                                                                                                                                                                                                                                                                                                                                                                 | 8            |
|        | Discrimination statistics                            | Report discrimination statistics (for example, C-statistic, ROC curve, AUC) and their statistical significance (for example, p-values, confidence intervals). One can also apply resampling method (for example, bootstrapping, cross-validation)                    | +1 (if a discrimination statistic and its statistical significance are reported)<br>+1 (if a resampling method technique is also applied)                                                                                                                                                                                                                                                          | 9            |
|        | Calibration statistics                               | Report calibration statistics (for example, Calibration-in-the-large/slope, calibration plots) and their statistical significance (for example, p values, confidence intervals). One can also apply resampling method (for example, bootstrapping, cross-validation) | +1 (if a calibration statistic and its statistical significance are reported)<br>+1 (if a resampling method technique is also applied)                                                                                                                                                                                                                                                             | 10           |
| 5      | Prospective study registered in a trial database     | Provides the highest level of evidence supporting the clinical validity and usefulness of the radiomics biomarker                                                                                                                                                    | +7 (for prospective validation of a radiomics signature in an appropriate trial)                                                                                                                                                                                                                                                                                                                   | 11           |
|        | Cost-effectiveness analysis                          | Report on the cost-effectiveness of the clinical application (for example, QALYs generated)                                                                                                                                                                          | +1                                                                                                                                                                                                                                                                                                                                                                                                 | 15           |
| 6      | Open science and data                                | Make code and data publicly available. Open science facilitates knowledge transfer and reproducibility of the study                                                                                                                                                  | +1 (if scans are open source) +1 (if ROI segmentations are open source) +1 (if code is open source) +1 (if radiomic features are calculated on a set of representative ROIs and the calculated features and representative ROIs are open source)                                                                                                                                                   | 16           |

AUC = area under the curve, QALY = quality adjusted life year, ROC = receiver operating characteristic, ROI = region of interest, RQS = radiomics quality score
