# Supplementary material for: Quality Reporting of Radiomics Analysis in Mild Cognitive Impairment and Alzheimer's Disease: A Roadmap for Moving Forward
Source: PubMed Central journal article supplement — Korean J Radiol. 2020 Oct 30;21(12):1345–54. doi: 10.3348/kjr.2020.0715 (PMC7689149; doi:10.3348/kjr.2020.0715), 2020-10-30
Supplement: kjr-21-1350-s003.pdf [file kjr-21-1350-s003.pdf]

**Supplementary Table 2. Characteristics of the Included Studies**

| Author (Year of Publication)   | Journal                                               | Purpose of Biomarker   | Imaging Type | Tesla (T) | Segmentation  | Number of Patients (Training:Test)                                                       | External Validation | Open Source Dataset |
|--------------------------------|-------------------------------------------------------|------------------------|--------------|-----------|---------------|------------------------------------------------------------------------------------------|---------------------|---------------------|
| Rajeesh et al. (2012)          | Asian Biomedicine                                     | Diagnostic             | MRI          | 3.0       | Automatic     | 279 (185:85)                                                                             | No                  | ADNI                |
| Oppedal et al. (2015)          | International Journal of Biomedical Imaging           | Prognostic             | MRI          | 1.5       | Automatic     | 146 (no test)                                                                            | No                  | NA                  |
| Martinez-Torteya et al. (2015) | Journal of Medical Imaging                            | Prognostic             | MRI          | 1.5 & 3.0 | Automatic     | 62 (no test)                                                                             | No                  | ADNI                |
| Ranjbar et al. (2019)          | Journal of Neuropsychiatry and Clinical Neurosciences | Diagnostic             | MRI          | 3.0       | Manual        | 173 (no test)                                                                            | No                  | ADNI                |
| Gao et al. (2018)              | Metabolic Brain Disease                               | Diagnostic             | MRI          | 1.5       | Automatic     | 299 (no test)                                                                            | No                  | ADNI                |
| López-Gómez et al. (2018)      | Diagnostics                                           | Diagnostic             | MRI          | 3.0       | Manual        | 105 (no test)                                                                            | No                  | ADNI                |
| Feng et al (2018)              | Frontiers in Neurology                                | Diagnostic             | MRI          | 3.0       | Manual        | 122 (70:30)                                                                              | No                  | NA                  |
| Maani et al. (2015)            | PLoS ONE                                              | Prognostic             | MRI          | 1.5       | Automatic     | 60 (no test)                                                                             | No                  | OASIS               |
| Vaithinathan et al. (2019)     | Journal of Neuroscience Methods                       | Prognostic             | MRI          | 1.5       | Automatic     | 812 (AD vs. NC-186:230; AD vs. MCI-186:399; NC vs. MCI-226:397; cMCI vs. MCIInc-164:232) | No                  | ADNI                |
| Hwang et al. (2016)            | Medical Physics                                       | Diagnostic             | MRI          | 3.0       | Automatic     | 54 (no test)                                                                             | No                  | NA                  |
| De Oliveira et al. (2010)      | American Journal of Neuroradiology                    | Diagnostic             | MRI          | 2.0       | Manual        | 49 (no test)                                                                             | No                  | NA                  |
| Zhang et al. (2011)            | Brain Imaging and Behavior                            | Prognostic             | MRI          | 3.0       | Manual        | 34 (20:14)                                                                               | No                  | NA                  |
| Ben Bouallegue et al (2018)    | Brain Imaging and Behavior                            | Diagnostic, prognostic | PET          |           | Automatic     | 760 (no test)                                                                            | No                  | ADNI                |
| Rohini et al. (2019)           | Computer Methods and Programs in Biomedicine          | Diagnostic             | MRI          | 3.0       | Automatic     | 233 (no test)                                                                            | No                  | ADNI                |
| Li et al. (2019)               | Therapeutic Advances in Neurological Disorders        | Diagnostic             | PET          |           | Automatic     | 466 (140:60, external test 44)                                                           | Yes                 | ADNI                |
| Feng et al. (2018)             | Frontiers in Aging Neuroscience                       | Diagnostic             | MRI          | 3.0       | Automatic     | 116 (no test)                                                                            | No                  | NA                  |
| Feng et al. (2019)             | Frontiers in Aging Neuroscience                       | Diagnostic             | MRI          | 3.0       | Automatic     | 86 (60:26)                                                                               | No                  | NA                  |
| Zhou et al. (2019)             | Frontiers in Neuroscience                             | Prognostic             | MRI, PET     | 1.5 & 3.0 | Automatic     | 263 (184:79)                                                                             | No                  | ADNI                |
| Hett et al. (2018)             | Computerized Medical Imaging and Graphics             | Prognostic             | MRI          | 1.5       | Automatic     | 800 (no test)                                                                            | No                  | ADNI                |
| Chaddad et al. (2018)          | IEEE Access                                           | Diagnostic             | MRI          | 1.5       | Automatic     | 235 (no test)                                                                            | No                  | OASIS               |
| Achterberg et al. (2019)       | Neurobiology of Aging                                 | Prognostic             | MRI          | 1.5       | Automatic     | 510 (no test)                                                                            | No                  | NA                  |
| Sørensen et al. (2015)         | Human Brain Mapping                                   | Diagnostic, prognostic | MRI          | 1.5       | Automatic     | 466 (no test)                                                                            | No                  | ADNI                |
| Lee et al. (2019)              | Journal of Psychiatry & Neuroscience                  | Prognostic             | MRI          | 3.0       | Automatic     | 460 (266:194)                                                                            | No                  | ADNI                |
| Tozer et al. (2018)            | Stroke                                                | Prognostic             | MRI          | 1.5       | Automatic     | 175 (no test)                                                                            | No                  | NA                  |
| Freeborough et al. (1998)      | IEEE Transactions on Medical Imaging                  | Diagnostic             | MRI          | 1.5       | Semiautomatic | 64 (30:34)                                                                               | No                  | NA                  |
| Hongming et al. (2018)         | Alzheimer's and Dementia                              | Prognostic             | MRI          | 1.5 & 3.0 | Automatic     | 2146 (803:1343)                                                                          | No                  | ADNI                |

AD = Alzheimer's disease, ADNI = Alzheimer's Disease Neuroimaging Initiative, cMCI = converted mild cognitive impairment, MCI = mild cognitive impairment, MCIInc = mild cognitive impairment non-converters, NA = not applicable, NC = normal control, OASIS = Open Access Series of Imaging Studies
