# Supplementary material for: Quality Reporting of Radiomics Analysis in Mild Cognitive Impairment and Alzheimer's Disease: A Roadmap for Moving Forward
Source: PubMed Central journal article supplement — Korean J Radiol. 2020 Oct 30;21(12):1345–54. doi: 10.3348/kjr.2020.0715 (PMC7689149; doi:10.3348/kjr.2020.0715), 2020-10-30
Supplement: kjr-21-1350-s004.pdf [file kjr-21-1350-s004.pdf]

**Supplementary Table 3. Subgroup Analysis of RQS according to Publish Date**

|                                                                                   | Publications<br>before 2019<br>(n = 18) | Publications<br>after 2019<br>(n = 8) | <i>P</i> * |
|-----------------------------------------------------------------------------------|-----------------------------------------|---------------------------------------|------------|
| Total 16 items (ideal score 36)                                                   | 0.8 ± 5.2                               | 8.1 ± 6.3                             | 0.006      |
| Domain 1-protocol quality and stability in image and segmentation (0 to 5 points) | 3 (2-3)                                 | 3 (2-3)                               | 0.461      |
| Protocol quality (2 points)                                                       | 2 (1-2)                                 | 2 (2-2)                               | 0.567      |
| Test-retest (1 point)                                                             | 0 (0-0)                                 | 0 (0-0)                               | 0.644      |
| Phantom study (1 point)                                                           | 0 (0-0)                                 | 0 (0-0)                               | 0.849      |
| Multiple segmentation (1 point)                                                   | 1 (0-1)                                 | 1 (1-1)                               | 0.338      |
| Domain 2-feature selection and validation (-8 to 8 points)                        | -2 (-8- -1)                             | 6 (-1-6)                              | 0.019      |
| Feature reduction or adjustment of multiple testing (-3 or 3 points)              | -3 (-3-3)                               | 3 (-3-3)                              | 0.238      |
| Validation (-5, 2, 3, 4, or 5 points)                                             | -5 (-5-0)                               | 3 (0-3)                               | 0.035      |
| Domain 3-biologic/clinical validation and utility (0 to 6 points)                 | 0 (0-0)                                 | 0 (0-1)                               | 0.367      |
| Non-radiomics features (1 point)                                                  | 0 (0-0)                                 | 0 (0-1)                               | 0.978      |
| Biologic correlations (1 point)                                                   | 0 (0-0)                                 | 0 (0-0)                               | 0.644      |
| Comparison to "gold standard" (2 points)                                          | 0 (0-0)                                 | 0 (0-1)                               | 0.461      |
| Potential clinical utility (2 points)                                             | 0 (0-0)                                 | 0 (0-0)                               | NA         |
| Domain 4-model performance index (0 to 5 points)                                  | 1 (0-1)                                 | 2 (1-2)                               | 0.062      |
| Cut-off analysis (1 point)                                                        | 0 (0-0)                                 | 0 (0-0)                               | NA         |
| Discrimination statistics (2 points)                                              | 1 (0-1)                                 | 2 (1-2)                               | 0.062      |
| Calibration statistics (2 points)                                                 | 0 (0-0)                                 | 0 (0-0)                               | NA         |
| Domain 5-high level of evidence (0 to 8 points)                                   | 0 (0-0)                                 | 0 (0-0)                               | NA         |
| Prospective study (7 points)                                                      | 0 (0-0)                                 | 0 (0-0)                               | NA         |
| Cost-effectiveness analysis (1 point)                                             | 0 (0-0)                                 | 0 (0-0)                               | NA         |
| Domain 6-open science and data (0 to 4 points)                                    | 1 (0-1)                                 | 1 (1-1)                               | 0.724      |

\*Calculated from Student *t* test or Mann-Whitney's test according to normality tests.
